# Supplementary material for: Different doses of ovalbumin exposure on dendritic cells determine their genetic/epigenetic regulation and T cell differentiation
Source: Aging (Albany NY). 2020 Nov 24;12(24):25432–51. doi: 10.18632/aging.104145 (PMC7803576; doi:10.18632/aging.104145)
Supplement: Supplementary Table 1 [file aging-12-104145-s002.pdf]

## SUPPLEMENTARY TABLE

**Supplementary Table 1. LPS concentrations  
in different doses of OVA.**

| <b>OVA</b> | <b>LPS</b>  |
|------------|-------------|
| 10mg/ml    | 2.917pg/ml  |
| 100mg/ml   | 4.104pg/ml  |
| 1000mg/ml  | 19.548pg/ml |
| 10000mg/ml | 63.143pg/ml |
